# Supplementary material
Source: publisher figshare collection journal article supplement (https://springernature.figshare.com/ndownloader/files/28869966)

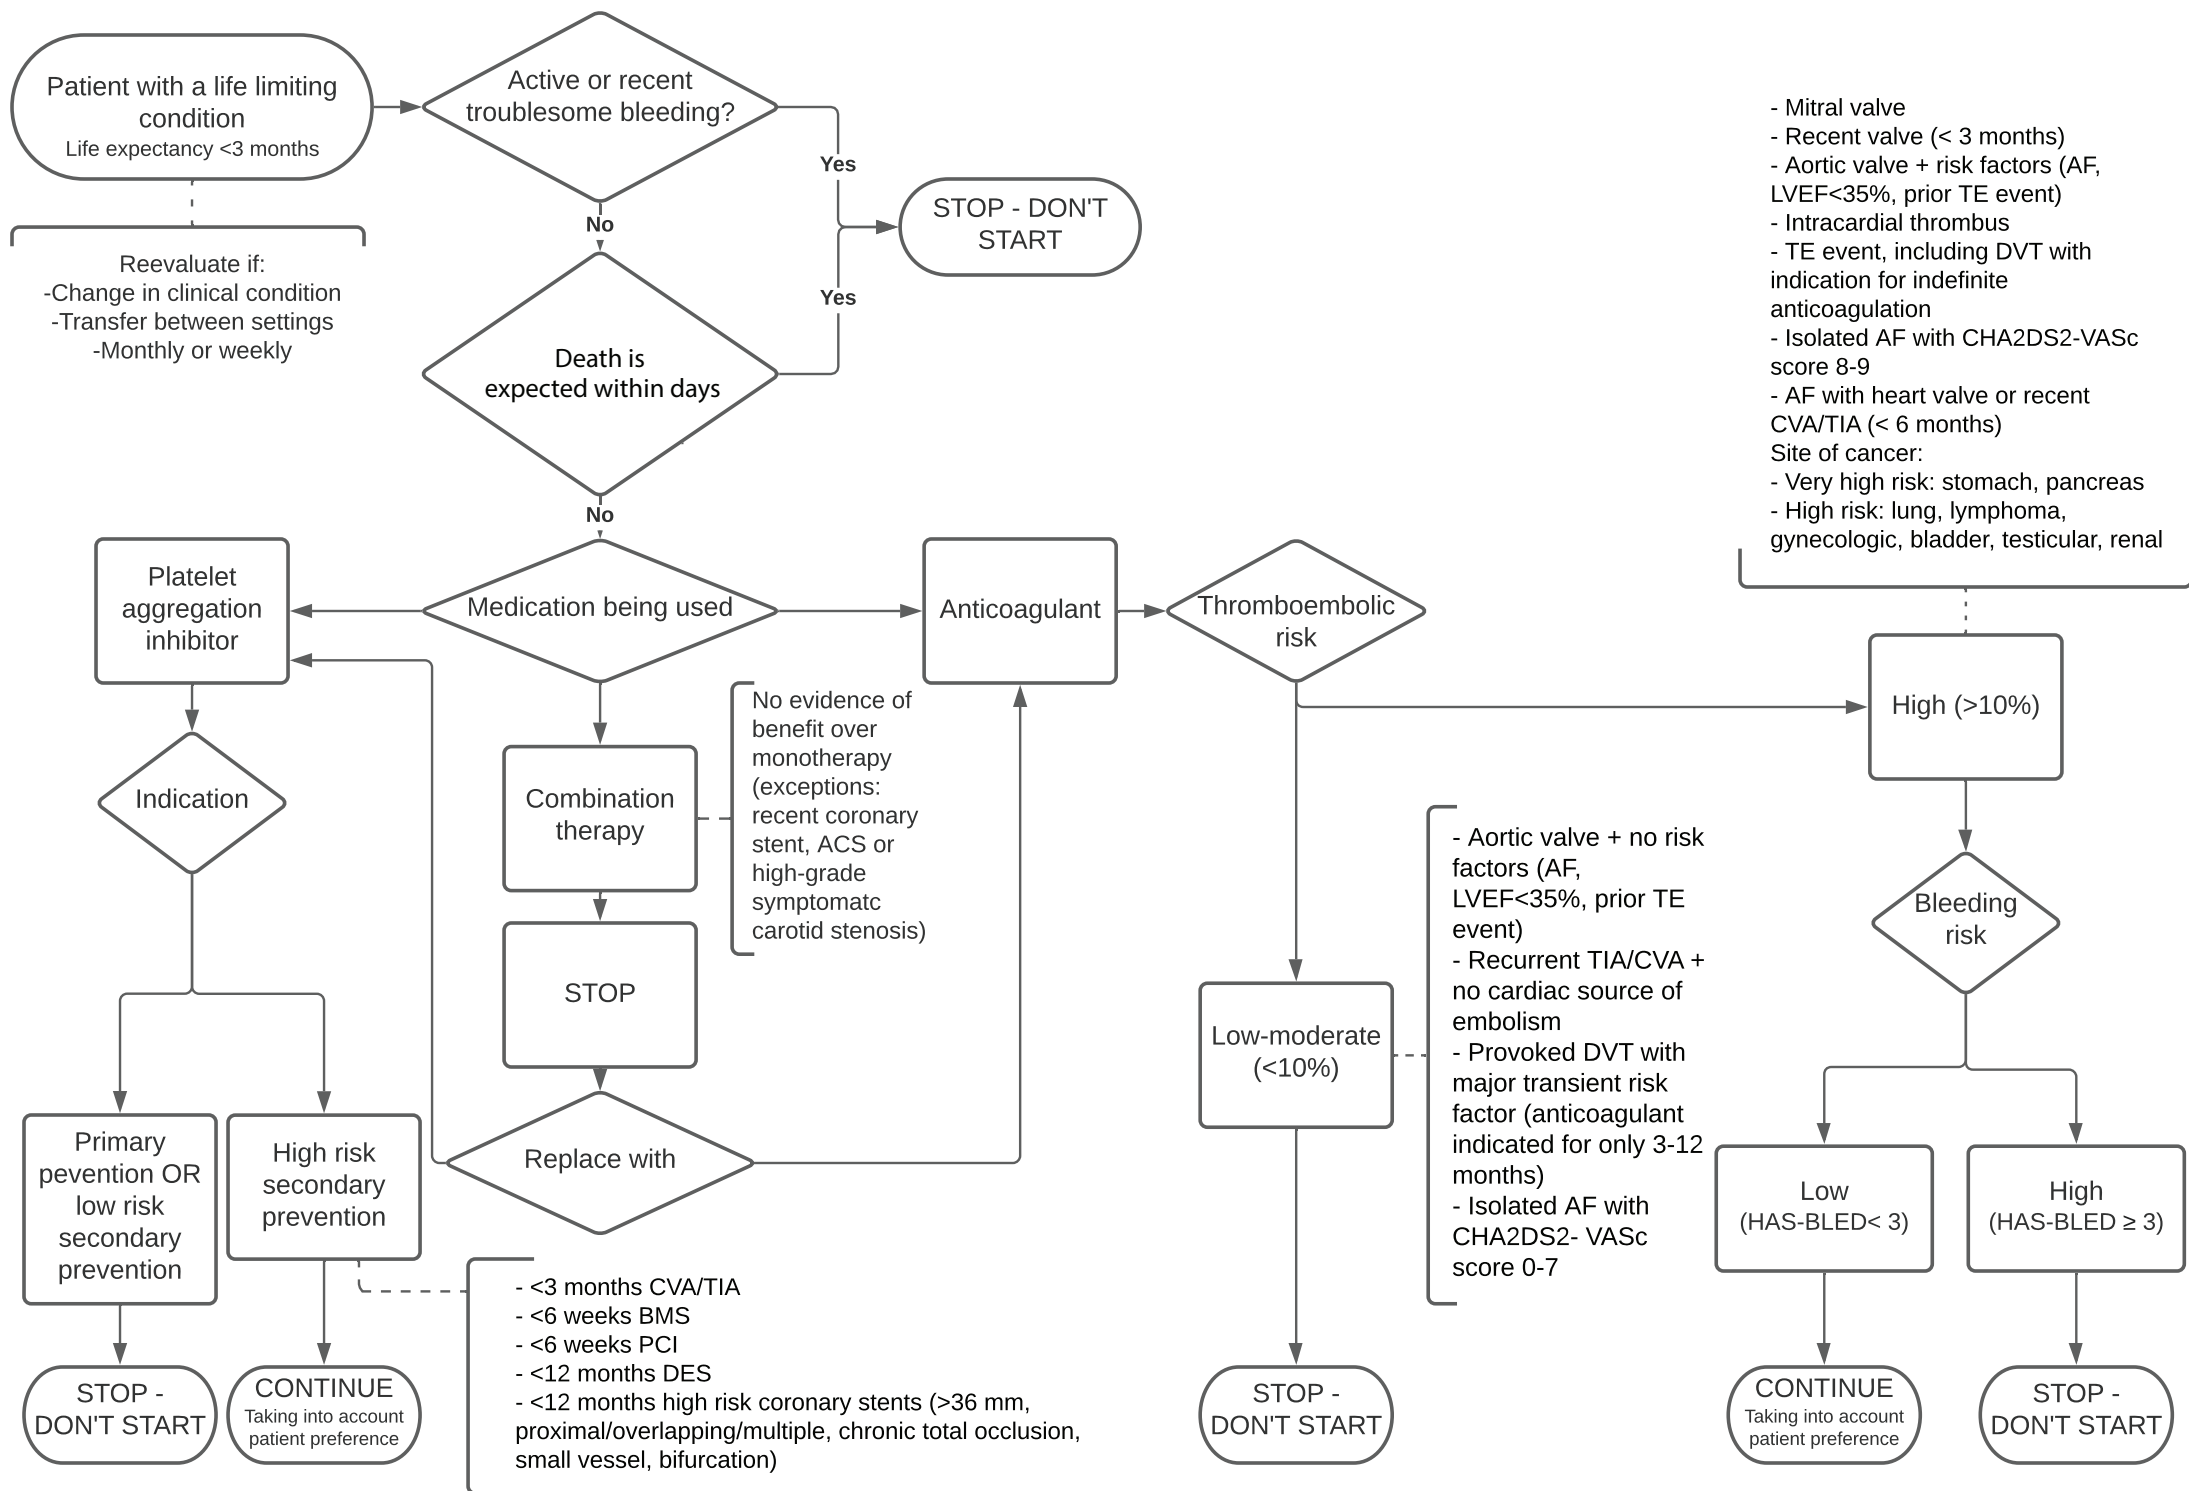

Supplement: Supplementary file 1 [file 28869966]

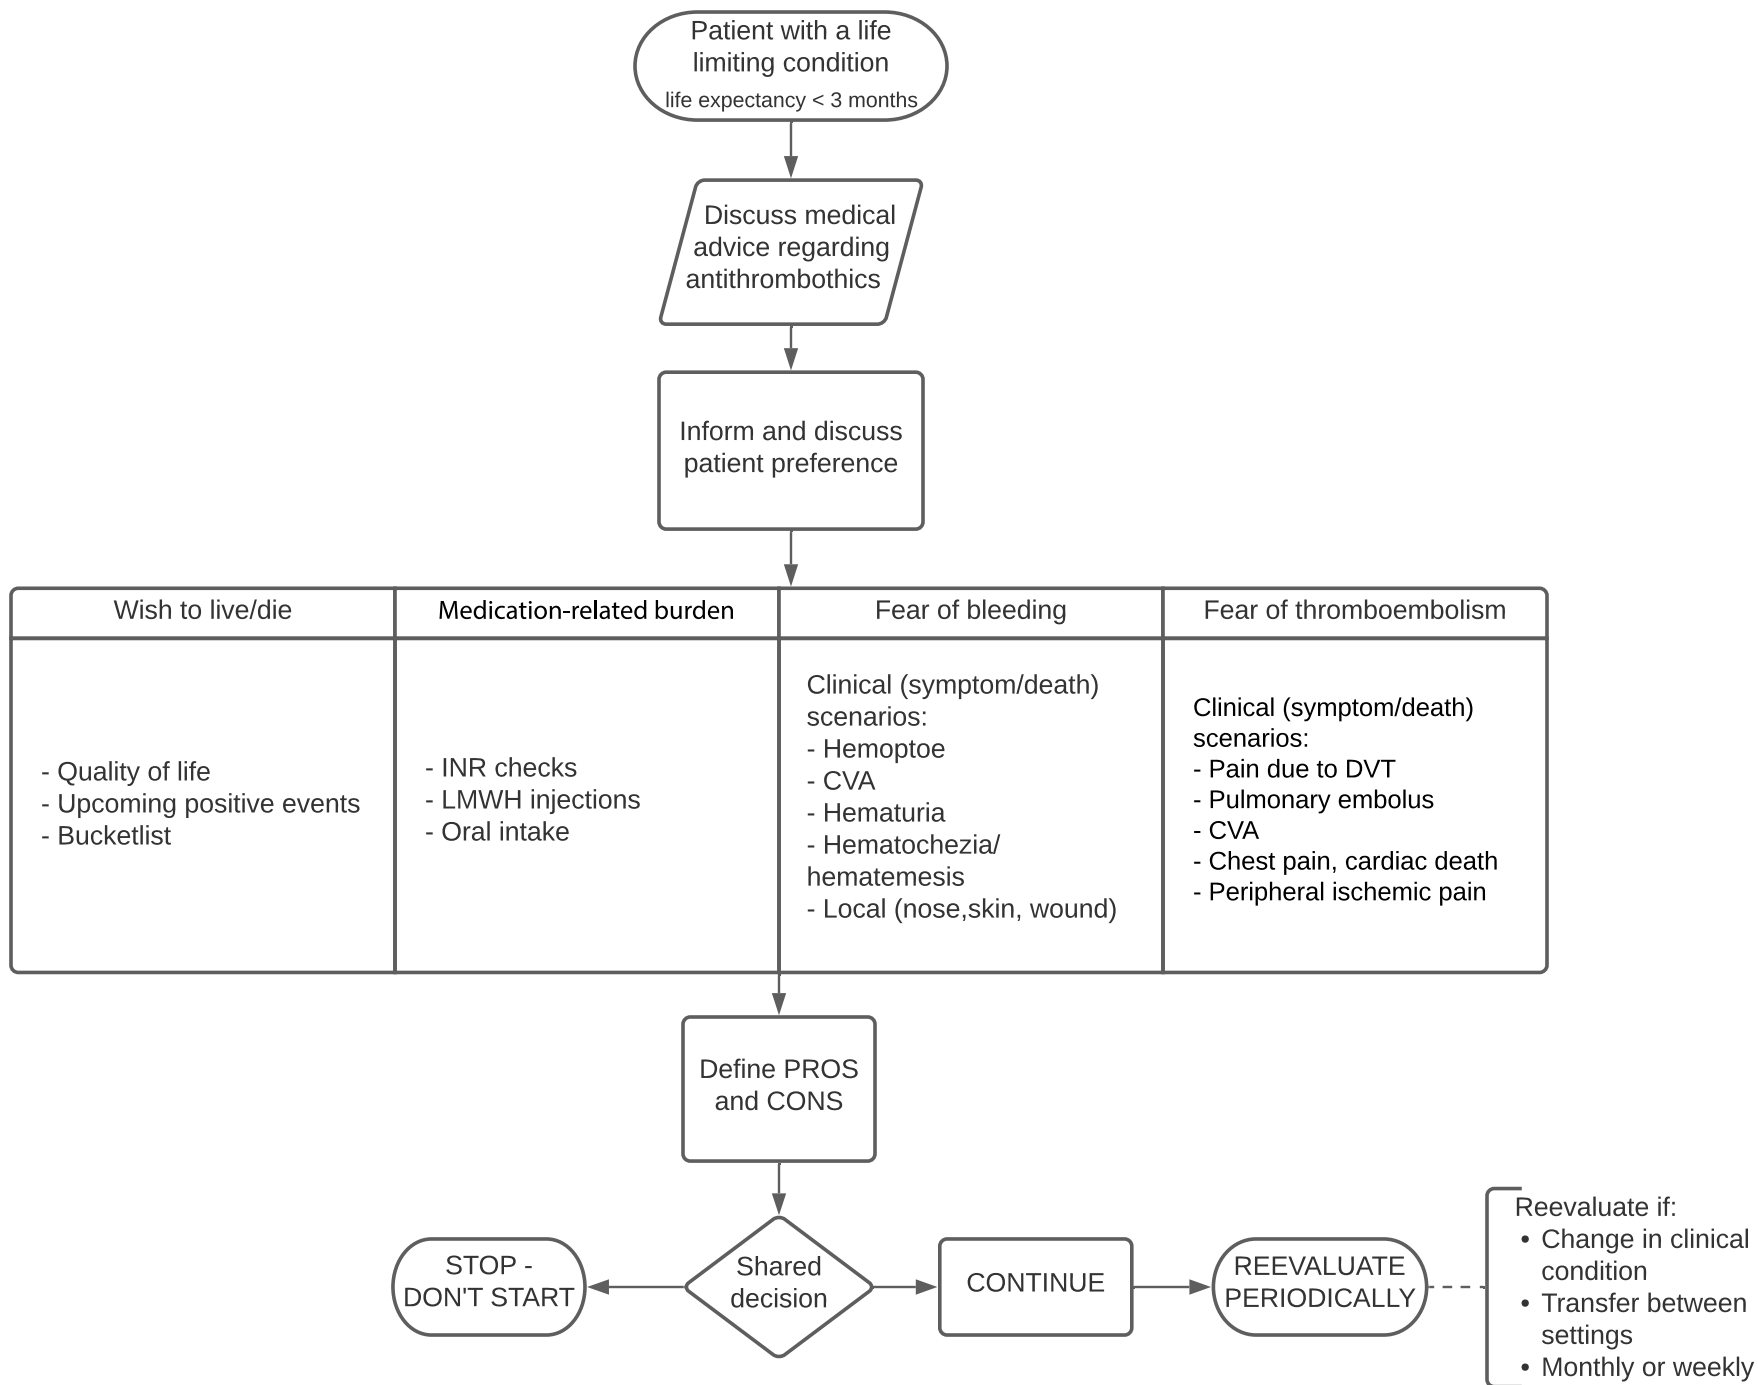

Supplement: Supplementary file 2 [file 28869966]
